# Supplementary material
Source: PubMed Central journal article supplement (PMC9201742)
Supplement: jamacardiol-e221561-s003.pdf [file jamacardiol-e221561-s003.pdf]

\*First name, last name, and suffix (if applicable) are required and will appear in PubMed.

| <b>*Group Name(s): AFIRE Investigators</b> |                   |                              |                  |                                                   |                                          |                                                         |                                                                                            |
|--------------------------------------------|-------------------|------------------------------|------------------|---------------------------------------------------|------------------------------------------|---------------------------------------------------------|--------------------------------------------------------------------------------------------|
| <b>*First Name and Middle Initial(s)</b>   | <b>*Last Name</b> | <b>*Suffix (eg, Jr, III)</b> | Academic Degrees | Institution                                       | Location (city, state/province, country) | Role or Contribution, eg, chair, principal investigator | Group (if more than 1 Group listed in the byline and/or Subgroup (eg, Steering Committee)) |
| Akihiro                                    | Nakamura          |                              |                  | Iwate Prefectural Central Hospital                |                                          |                                                         |                                                                                            |
| Eiji                                       | Tamiya            |                              |                  | Koto Hospital                                     |                                          |                                                         |                                                                                            |
| Tadashi                                    | Yamamoto          |                              |                  | Hokkaido Cardiovascular Hospital                  |                                          |                                                         |                                                                                            |
| Syuji                                      | Suetake           |                              |                  | Kaetsu Hospital                                   |                                          |                                                         |                                                                                            |
| Teruo                                      | Noguchi           |                              |                  | National Cerebral and Cardiovascular Center       |                                          |                                                         |                                                                                            |
| Shinichi                                   | Nakamura          |                              |                  | Hitoyoshi Medhical Center                         |                                          |                                                         |                                                                                            |
| Akihiko                                    | Matsumura         |                              |                  | Kameda Medical Center                             |                                          |                                                         |                                                                                            |
| Jisho                                      | Kojima            |                              |                  | Kojima Clinic                                     |                                          |                                                         |                                                                                            |
| Hiroshi                                    | Yamaguchi         |                              |                  | Hiroshi Yamaguchi Clinic                          |                                          |                                                         |                                                                                            |
| Satoru                                     | Suwa              |                              |                  | Juntendo University Shizuoka Hospital             |                                          |                                                         |                                                                                            |
| Takanori                                   | Yasu              |                              |                  | Dokkyo Medhical University Nikko Medical Center   |                                          |                                                         |                                                                                            |
| Akihiro                                    | Nakajima          |                              |                  | New Tokyo Hospital                                |                                          |                                                         |                                                                                            |
| Takahisa                                   | Yamada            |                              |                  | Osaka General Medical Center                      |                                          |                                                         |                                                                                            |
| Hidekazu                                   | Arai              |                              |                  | Kanoya Heart Center                               |                                          |                                                         |                                                                                            |
| Yoshiki                                    | Hata              |                              |                  | Minamino Cardiovascular Hospital                  |                                          |                                                         |                                                                                            |
| Toshihiko                                  | Sakanashi         |                              |                  | Sakanashi Heart Clinic                            |                                          |                                                         |                                                                                            |
| Hironobu                                   | Tateishi          |                              |                  | Koyo Newtown Hospital                             |                                          |                                                         |                                                                                            |
| Toru                                       | Nakayama          |                              |                  | Nakayama Clinic                                   |                                          |                                                         |                                                                                            |
| Yoichi                                     | Nozaki            |                              |                  | Hokkokinen Hospital                               |                                          |                                                         |                                                                                            |
| Yasuo                                      | Okumura           |                              |                  | Nihon University Itabashi Hospital                |                                          |                                                         |                                                                                            |
| Masahide                                   | Tokue             |                              |                  | Toho University Medical Center<br>Ohashi Hospital |                                          |                                                         |                                                                                            |

## Supplemental Online Content: Nonauthor Collaborators

\*First name, last name, and suffix (if applicable) are required and will appear in PubMed.

| *First Name and Middle Initial(s) | *Last Name | *Suffix (eg, Jr, III) | Academic Degrees | Institution                                                | Location (city, state/province, country) | Role or Contribution, eg, chair, principal investigator | Group (if more than 1 Group listed in the byline) and/or Subgroup (eg, Steering Committee) |
|-----------------------------------|------------|-----------------------|------------------|------------------------------------------------------------|------------------------------------------|---------------------------------------------------------|--------------------------------------------------------------------------------------------|
| Norihiro                          | Kuroki     |                       |                  | Tokyo Metropolitan Bokutoh Hospital                        |                                          |                                                         |                                                                                            |
| Yasuyuki                          | Maruyama   |                       |                  | Iwatsuki-minami Hospital                                   |                                          |                                                         |                                                                                            |
| Hiroshi                           | Suzuki     |                       |                  | Showa University Fujigaoka Hospital                        |                                          |                                                         |                                                                                            |
| Yasunori                          | Nishida    |                       |                  | Kouseikai Takai Hospital                                   |                                          |                                                         |                                                                                            |
| Masazumi                          | Ajioka     |                       |                  | Tosei General Hospital                                     |                                          |                                                         |                                                                                            |
| Kazuhiko                          | Yumoto     |                       |                  | Yokohama Rosai Hospita                                     |                                          |                                                         |                                                                                            |
| Shogo                             | Shimizu    |                       |                  | Mashiko Hospital                                           |                                          |                                                         |                                                                                            |
| Takahiko                          | Aoyama     |                       |                  | Fukui Prefectural Hospital                                 |                                          |                                                         |                                                                                            |
| Hideki                            | Shimomura  |                       |                  | Fukuoka Tokushukai Hospital                                |                                          |                                                         |                                                                                            |
| Terunori                          | Takeda     |                       |                  | Koto Memorial Hospital                                     |                                          |                                                         |                                                                                            |
| Koichi                            | Oshiro     |                       |                  | Ohama Dai-ichi Hospital                                    |                                          |                                                         |                                                                                            |
| Nobuyoshi                         | Sugishita  |                       |                  | Sugishita Clinic                                           |                                          |                                                         |                                                                                            |
| Yoshisato                         | Shibata    |                       |                  | Miyazaki Medical Association Hospital                      |                                          |                                                         |                                                                                            |
| Takatoshi                         | Otonari    |                       |                  | Otonari Clinic                                             |                                          |                                                         |                                                                                            |
| Makoto                            | Shimizu    |                       |                  | International Goodwill Hospital                            |                                          |                                                         |                                                                                            |
| Hajime                            | Kihara     |                       |                  | Kihara Cardiovascular Clinic                               |                                          |                                                         |                                                                                            |
| Hiroshi                           | Ogawa      |                       |                  | Kitaakita Municipal Hospital                               |                                          |                                                         |                                                                                            |
| Atsuyuki                          | Ono        |                       |                  | Medical Corporation Shoikai Kasai Shoikai Hospital         |                                          |                                                         |                                                                                            |
| Minoru                            | Hazama     |                       |                  | Nijigaoka Hospital                                         |                                          |                                                         |                                                                                            |
| Kengo                             | Tsukahara  |                       |                  | Fujisawa City Hospital                                     |                                          |                                                         |                                                                                            |
| Seichi                            | Haruta     |                       |                  | Fukuyama Cardiovascular Hospital                           |                                          |                                                         |                                                                                            |
| Tetsuya                           | Haruna     |                       |                  | Kitano Hospital, Tazuke Kofukai Medical Research Institute |                                          |                                                         |                                                                                            |
| Masaaki                           | Ito        |                       |                  | Mie University Hospital                                    |                                          |                                                         |                                                                                            |
| Kenji                             | Fujii      |                       |                  | Sakurabashi Watanabe Hospital                              |                                          |                                                         |                                                                                            |
| Nobuhiko                          | Atsuchi    |                       |                  | Tenyokai Central Clinic                                    |                                          |                                                         |                                                                                            |

## Supplemental Online Content: Nonauthor Collaborators

\*First name, last name, and suffix (if applicable) are required and will appear in PubMed.

| *First Name and Middle Initial(s) | *Last Name | *Suffix (eg, Jr, III) | Academic Degrees | Institution                                             | Location (city, state/province, country) | Role or Contribution, eg, chair, principal investigator | Group (if more than 1 Group listed in the byline) and/or Subgroup (eg, Steering Committee) |
|-----------------------------------|------------|-----------------------|------------------|---------------------------------------------------------|------------------------------------------|---------------------------------------------------------|--------------------------------------------------------------------------------------------|
| Masataka                          | Sata       |                       |                  | Tokushima University Hospital                           |                                          |                                                         |                                                                                            |
| Takatoshi                         | Wakeyama   |                       |                  | Tokuyama Central Hospital                               |                                          |                                                         |                                                                                            |
| Naoyuki                           | Hasebe     |                       |                  | Asahikawa Medical University Hospital                   |                                          |                                                         |                                                                                            |
| Yoshio                            | Kobayasi   |                       |                  | Chiba University Hospita                                |                                          |                                                         |                                                                                            |
| Kazuo                             | Osato      |                       |                  | Fukui CardioVascular Center                             |                                          |                                                         |                                                                                            |
| Kiyoshi                           | Hironaga   |                       |                  | Fukuoka City Hospital                                   |                                          |                                                         |                                                                                            |
| Yujiro                            | Naganuma   |                       |                  | Hachinohe Red Cross Hospital                            |                                          |                                                         |                                                                                            |
| Kazuhiro                          | Anzaki     |                       |                  | Izumi Regional Medical Center                           |                                          |                                                         |                                                                                            |
| Shinya                            | Okazaki    |                       |                  | Juntendo University Hospital                            |                                          |                                                         |                                                                                            |
| Yusuke                            | Nakagawa   |                       |                  | Kawanishi City Hospital                                 |                                          |                                                         |                                                                                            |
| Keichi                            | Tokuhiro   |                       |                  | Misato Central General Hospital                         |                                          |                                                         |                                                                                            |
| Koichi                            | Tanaka     |                       |                  | Miyoshi Central Hospital                                |                                          |                                                         |                                                                                            |
| Tomoyasu                          | Momose     |                       |                  | Nagano Matsushiro General Hospital                      |                                          |                                                         |                                                                                            |
| Yusuke                            | Fukushima  |                       |                  | Nagatsuda Kosei General Hospital                        |                                          |                                                         |                                                                                            |
| Ryosuke                           | Kametani   |                       |                  | Nagoya Tokushukai General Hospital                      |                                          |                                                         |                                                                                            |
| Katsunori                         | Kawamitsu  |                       |                  | Nanbu Tokushukai Hospital                               |                                          |                                                         |                                                                                            |
| Yoshihiko                         | Saito      |                       |                  | Nara Medical University                                 |                                          |                                                         |                                                                                            |
| Shintaro                          | Akashi     |                       |                  | National Hospital Organization<br>Hamada Medical Center |                                          |                                                         |                                                                                            |
| Kenta                             | Kumagai    |                       |                  | Odawara Cardiovascular Hospital                         |                                          |                                                         |                                                                                            |
| Kenichi                           | Eshima     |                       |                  | Saga-Ken Medical Centre Koseikan                        |                                          |                                                         |                                                                                            |
| Tetsuya                           | Tobaru     |                       |                  | Sakakibara Heart Institute                              |                                          |                                                         |                                                                                            |
| Toshihiko                         | Seo        |                       |                  | Seo Heart Clinic                                        |                                          |                                                         |                                                                                            |
| Koichiro                          | Okuhara    |                       |                  | Shobara Red Cross Hospital                              |                                          |                                                         |                                                                                            |
| Ken                               | Kozuma     |                       |                  | Teikyo University Hospital                              |                                          |                                                         |                                                                                            |

## Supplemental Online Content: Nonauthor Collaborators

\*First name, last name, and suffix (if applicable) are required and will appear in PubMed.

| *First Name and Middle Initial(s) | *Last Name | *Suffix (eg, Jr, III) | Academic Degrees | Institution                                          | Location (city, state/province, country) | Role or Contribution, eg, chair, principal investigator | Group (if more than 1 Group listed in the byline) and/or Subgroup (eg, Steering Committee) |
|-----------------------------------|------------|-----------------------|------------------|------------------------------------------------------|------------------------------------------|---------------------------------------------------------|--------------------------------------------------------------------------------------------|
| Yuji                              | Ikari      |                       |                  | Tokai University Hospital                            |                                          |                                                         |                                                                                            |
| Toshiyuki                         | Takahashi  |                       |                  | Tokyo Saiseikai Central Hospital                     |                                          |                                                         |                                                                                            |
| Koji                              | Oiwa       |                       |                  | Yokohama Chuo Hospital                               |                                          |                                                         |                                                                                            |
| Ichiro                            | Michishita |                       |                  | Yokohama Sakae Kyosai Hospital                       |                                          |                                                         |                                                                                            |
| Hisanori                          | Fujikura   |                       |                  | Fujikura Clinic                                      |                                          |                                                         |                                                                                            |
| Shinichi                          | Momomura   |                       |                  | Jichi Medical University Saitama Medical Center      |                                          |                                                         |                                                                                            |
| Yoshihiro                         | Yamamoto   |                       |                  | Kansai Medical University Medical Center             |                                          |                                                         |                                                                                            |
| Kenichiro                         | Otomo      |                       |                  | Ome Municipal Hospital                               |                                          |                                                         |                                                                                            |
| Taku                              | Matsubara  |                       |                  | Shinrakuen Hospital                                  |                                          |                                                         |                                                                                            |
| Hideki                            | Tashiro    |                       |                  | St.Mary's Hospital                                   |                                          |                                                         |                                                                                            |
| Teruo                             | Inoue      |                       |                  | Dokkyo Medical University Hospital                   |                                          |                                                         |                                                                                            |
| Masaharu                          | Ishihara   |                       |                  | Hyogo College Of Medicine College Hospital           |                                          |                                                         |                                                                                            |
| Ichiro                            | Shiojima   |                       |                  | Kansai Medical University Hospital                   |                                          |                                                         |                                                                                            |
| Eizo                              | Tachibana  |                       |                  | Kawaguchi Municipal Medical Center                   |                                          |                                                         |                                                                                            |
| Kotaro                            | Sumii      |                       |                  | MAZDA Hospital                                       |                                          |                                                         |                                                                                            |
| Nobuyasu                          | Yamamoto   |                       |                  | Miyazaki Prefectural Nobeoka Hospita                 |                                          |                                                         |                                                                                            |
| Nobuhiro                          | Omura      |                       |                  | Nakata Clinic                                        |                                          |                                                         |                                                                                            |
| Toshihiro                         | Nakamura   |                       |                  | National Hospital Organization Kyushu Medical Center |                                          |                                                         |                                                                                            |
| Naohiko                           | Takahashi  |                       |                  | Oita University Hospital                             |                                          |                                                         |                                                                                            |
| Yukiko                            | Morita     |                       |                  | SAGAMIHARA NATIONAL HOSPITAL                         |                                          |                                                         |                                                                                            |
| Kouki                             | Watanabe   |                       |                  | Saiseikai Matsuyama Hospital                         |                                          |                                                         |                                                                                            |

## Supplemental Online Content: Nonauthor Collaborators

\*First name, last name, and suffix (if applicable) are required and will appear in PubMed.

| *First Name and Middle Initial(s) | *Last Name | *Suffix (eg, Jr, III) | Academic Degrees | Institution                                                                     | Location (city, state/province, country) | Role or Contribution, eg, chair, principal investigator | Group (if more than 1 Group listed in the byline) and/or Subgroup (eg, Steering Committee) |
|-----------------------------------|------------|-----------------------|------------------|---------------------------------------------------------------------------------|------------------------------------------|---------------------------------------------------------|--------------------------------------------------------------------------------------------|
| Hiroyuki                          | Fujinaga   |                       |                  | Tokushima Prefectural Central Hospital                                          |                                          |                                                         |                                                                                            |
| Michiro                           | Maruyama   |                       |                  | Toyama Prefectural Central Hospital                                             |                                          |                                                         |                                                                                            |
| Takefumi                          | Oka        |                       |                  | Tsuyama Chuo Hospital                                                           |                                          |                                                         |                                                                                            |
| Takeshi                           | Shirayama  |                       |                  | University Hospital, Kyoto Prefectural University of Medicine                   |                                          |                                                         |                                                                                            |
| Tetsuya                           | Amano      |                       |                  | Aichi Medical University Hospital                                               |                                          |                                                         |                                                                                            |
| Kazuki                            | Fukui      |                       |                  | Kanagawa Cardiovascular and Respiratory Center                                  |                                          |                                                         |                                                                                            |
| Kenji                             | Ando       |                       |                  | Kokura Memorial Hospital                                                        |                                          |                                                         |                                                                                            |
| Shuichi                           | Oshima     |                       |                  | Kumamoto Chuo Hospital                                                          |                                          |                                                         |                                                                                            |
| Shuntaro                          | Kagiyama   |                       |                  | Kyushu Central Hospital of the Mutual Aid Association of Public School Teachers |                                          |                                                         |                                                                                            |
| Hiroki                            | Teragawa   |                       |                  | Medical Corporation JR Hiroshima Hospital                                       |                                          |                                                         |                                                                                            |
| Masaru                            | Yuge       |                       |                  | Odawara Municipal Hospital                                                      |                                          |                                                         |                                                                                            |
| Shiro                             | Ono        |                       |                  | Saiseikai Yamaguchi hospita                                                     |                                          |                                                         |                                                                                            |
| Tokushi                           | Koga       |                       |                  | Steel Memorial Yawata Hospital                                                  |                                          |                                                         |                                                                                            |
| Katsuhito                         | Fujiu      |                       |                  | The University of Tokyo Hospital                                                |                                          |                                                         |                                                                                            |
| Masanari                          | Kuwabara   |                       |                  | Toranomon Hospital                                                              |                                          |                                                         |                                                                                            |
| Yusuke                            | Oya        |                       |                  | University of the Ryukyus Hospital                                              |                                          |                                                         |                                                                                            |
| Yoshihiro                         | Yumoto     |                       |                  | Fuji Hospital                                                                   |                                          |                                                         |                                                                                            |
| Naomitsu                          | Kuji       |                       |                  | Good Heart Clinic                                                               |                                          |                                                         |                                                                                            |
| Makoto                            | Ikemura    |                       |                  | Ikemura Medical Clinic                                                          |                                          |                                                         |                                                                                            |

## Supplemental Online Content: Nonauthor Collaborators

\*First name, last name, and suffix (if applicable) are required and will appear in PubMed.

| *First Name and Middle Initial(s) | *Last Name | *Suffix (eg, Jr, III) | Academic Degrees | Institution                                      | Location (city, state/province, country) | Role or Contribution, eg, chair, principal investigator | Group (if more than 1 Group listed in the byline and/or Subgroup (eg, Steering Committee)) |
|-----------------------------------|------------|-----------------------|------------------|--------------------------------------------------|------------------------------------------|---------------------------------------------------------|--------------------------------------------------------------------------------------------|
| Kazuomi                           | Kario      |                       |                  | Jichi Medical University Hospital                |                                          |                                                         |                                                                                            |
| Kenichi                           | Chatani    |                       |                  | Kawasaki Municipal Tama Hospital                 |                                          |                                                         |                                                                                            |
| Koji                              | Sato       |                       |                  | Kumamoto City Hospital                           |                                          |                                                         |                                                                                            |
| Hiroo                             | Miyagi     |                       |                  | Miyagi Clinic                                    |                                          |                                                         |                                                                                            |
| Mikitaka                          | Murakami   |                       |                  | Murakami Clinic                                  |                                          |                                                         |                                                                                            |
| Katumi                            | Saito      |                       |                  | Nishiarai Heart Center Hospital                  |                                          |                                                         |                                                                                            |
| Masaaki                           | Hoshiga    |                       |                  | Osaka Medical College Hospital                   |                                          |                                                         |                                                                                            |
| Shinji                            | Sato       |                       |                  | Saiseikai Imabari Hospital                       |                                          |                                                         |                                                                                            |
| Norifumi                          | Kubo       |                       |                  | Saitama Medhical Center                          |                                          |                                                         |                                                                                            |
| Yasuhiro                          | Sakamoto   |                       |                  | Sakamoto Cardiovascular Clinic                   |                                          |                                                         |                                                                                            |
| Kazuhiro                          | Ashida     |                       |                  | Seirei Yokohama Hospital                         |                                          |                                                         |                                                                                            |
| Hiroki                            | Sakamoto   |                       |                  | Shizuoka Prefectural Hospital                    |                                          |                                                         |                                                                                            |
| Saroshi                           | Murasaki   |                       |                  | Tama-Hokubu Medical Center                       |                                          |                                                         |                                                                                            |
| Hiroki                            | Uehara     |                       |                  | Urasoe General Hospital                          |                                          |                                                         |                                                                                            |
| Takashi                           | Akasaka    |                       |                  | Wakayama Medical University Hospital             |                                          |                                                         |                                                                                            |
| Yurika                            | Oba        |                       |                  | Chihaya Hospital                                 |                                          |                                                         |                                                                                            |
| Shiro                             | Nakahara   |                       |                  | Dokkyo Medical University Saitama Medical Center |                                          |                                                         |                                                                                            |
| Yoichi                            | Hanaoka    |                       |                  | Hanaoka Cardiovascular Clinic                    |                                          |                                                         |                                                                                            |
| Toshitaka                         | Nishimiya  |                       |                  | Japanese Red Cross Asahikawa Hospital            |                                          |                                                         |                                                                                            |
| Ryusuke                           | Tsunoda    |                       |                  | Japanese Red Cross Kumamoto Hospital             |                                          |                                                         |                                                                                            |
| Yoshito                           | Onuma      |                       |                  | JR Sapporo Hospital                              |                                          |                                                         |                                                                                            |
| Sadanobu                          | Higuchi    |                       |                  | Kamiamakusa General Hospital                     |                                          |                                                         |                                                                                            |
| Akihiro                           | Tani       |                       |                  | Kano General Hospital                            |                                          |                                                         |                                                                                            |
| Atsuyuki                          | Wada       |                       |                  | Kusatsu General Hospital                         |                                          |                                                         |                                                                                            |
| Masashi                           | Kato       |                       |                  | Mie Heart Center                                 |                                          |                                                         |                                                                                            |

## Supplemental Online Content: Nonauthor Collaborators

\*First name, last name, and suffix (if applicable) are required and will appear in PubMed.

| *First Name and Middle Initial(s) | *Last Name | *Suffix (eg, Jr, III) | Academic Degrees | Institution                                                               | Location (city, state/province, country) | Role or Contribution, eg, chair, principal investigator | Group (if more than 1 Group listed in the byline) and/or Subgroup (eg, Steering Committee) |
|-----------------------------------|------------|-----------------------|------------------|---------------------------------------------------------------------------|------------------------------------------|---------------------------------------------------------|--------------------------------------------------------------------------------------------|
| Hiromi                            | Obata      |                       |                  | National Hospital Organization<br>Obihiro Hospital                        |                                          |                                                         |                                                                                            |
| Yoshiharu                         | Higuchi    |                       |                  | Osaka Police Hospital                                                     |                                          |                                                         |                                                                                            |
| Tsutomu                           | Endo       |                       |                  | Saiseikai Yokohamashi Nanbu<br>Hospital                                   |                                          |                                                         |                                                                                            |
| Ritsushi                          | Kato       |                       |                  | Saitama Medical University<br>International Medical Center                |                                          |                                                         |                                                                                            |
| Toshiro                           | Matsunaga  |                       |                  | Suizenji Tohya Hospital                                                   |                                          |                                                         |                                                                                            |
| Tosizo                            | Matsuoka   |                       |                  | Uji Tokushukai Medical Center                                             |                                          |                                                         |                                                                                            |
| Hiroo                             | Noguchi    |                       |                  | Fukuoka Wajiro Hospital                                                   |                                          |                                                         |                                                                                            |
| Makoto                            | Usui       |                       |                  | Hamanomachi Hospital                                                      |                                          |                                                         |                                                                                            |
| Takahiro                          | Hayashi    |                       |                  | Hayashi Medical Clinic                                                    |                                          |                                                         |                                                                                            |
| Yutaka                            | Otsuji     |                       |                  | Hospital of the University of<br>Occupational and Environmental<br>Health |                                          |                                                         |                                                                                            |
| Takuya                            | Osaki      |                       |                  | Iwate Prefectural Kuji Hospital                                           |                                          |                                                         |                                                                                            |
| Hirofumi                          | Zaizen     |                       |                  | JA Oita Koseiren Tsurumil Hospital                                        |                                          |                                                         |                                                                                            |
| Hirohata                          | Yoshihara  |                       |                  | JA Toride Medical Center                                                  |                                          |                                                         |                                                                                            |
| Kazushige                         | Kadota     |                       |                  | Kurashiki Central Hospital                                                |                                          |                                                         |                                                                                            |
| Toyoki                            | Hirose     |                       |                  | Minamata City Hospital & Medical<br>Center                                |                                          |                                                         |                                                                                            |
| Takuya                            | Miyazawa   |                       |                  | Miyazawa Heart Clinic                                                     |                                          |                                                         |                                                                                            |
| Atsushi                           | Mori       |                       |                  | National Hospital Organization<br>Iwakuni Clinical Center                 |                                          |                                                         |                                                                                            |
| Masamitsu                         | Takano     |                       |                  | Nippon Medical School Chiba<br>Hokusoh Hospital                           |                                          |                                                         |                                                                                            |
| Wataru                            | Shimizu    |                       |                  | Nippon Medical School Hospital                                            |                                          |                                                         |                                                                                            |
| Minoru                            | Wake       |                       |                  | Okinawa Prefectural Chubu Hospital                                        |                                          |                                                         |                                                                                            |

## Supplemental Online Content: Nonauthor Collaborators

\*First name, last name, and suffix (if applicable) are required and will appear in PubMed.

| *First Name and Middle Initial(s) | *Last Name | *Suffix (eg, Jr, III) | Academic Degrees | Institution                                      | Location (city, state/province, country) | Role or Contribution, eg, chair, principal investigator | Group (if more than 1 Group listed in the byline) and/or Subgroup (eg, Steering Committee) |
|-----------------------------------|------------|-----------------------|------------------|--------------------------------------------------|------------------------------------------|---------------------------------------------------------|--------------------------------------------------------------------------------------------|
| Seizo                             | Oriso      |                       |                  | Oriso Internal Medicine&Cardiology Clinic        |                                          |                                                         |                                                                                            |
| Minoru                            | Yoshiyama  |                       |                  | Osaka City University Hospital                   |                                          |                                                         |                                                                                            |
| Shigeo                            | Kakinoki   |                       |                  | Otaru Kyokai Hospital                            |                                          |                                                         |                                                                                            |
| Toshihiko                         | Nishioka   |                       |                  | Saitama Medhical Center                          |                                          |                                                         |                                                                                            |
| Takefumi                          | Ozaki      |                       |                  | Sapporo Orthopaedics and Cardiovascular Hospital |                                          |                                                         |                                                                                            |
| Kazumiki                          | Nomoto     |                       |                  | Tokyo Rinkai Hospital                            |                                          |                                                         |                                                                                            |
| Kosaburo                          | Seki       |                       |                  | Yamaguchi Rosai Hospital                         |                                          |                                                         |                                                                                            |
| Kazuya                            | Kawai      |                       |                  | Chikamori Hospital                               |                                          |                                                         |                                                                                            |
| Yukio                             | Ozaki      |                       |                  | Fujita Health University Hospital                |                                          |                                                         |                                                                                            |
| Shinichiro                        | Miura      |                       |                  | Fukuoka University Hospital                      |                                          |                                                         |                                                                                            |
| Masanori                          | Kawasaki   |                       |                  | Gifu University Hospital                         |                                          |                                                         |                                                                                            |
| Ryuichi                           | Funada     |                       |                  | Gunma University Hospital                        |                                          |                                                         |                                                                                            |
| Keigo                             | Dote       |                       |                  | Hiroshima City Asa Citizens Hospital             |                                          |                                                         |                                                                                            |
| Shinya                            | Okamoto    |                       |                  | Iwasaki Hospital                                 |                                          |                                                         |                                                                                            |
| Takayuki                          | Owada      |                       |                  | Japanese Red Cross Society Fukushima Hospital    |                                          |                                                         |                                                                                            |
| Tomohiro                          | Doke       |                       |                  | Kohka Public Hospital                            |                                          |                                                         |                                                                                            |
| Toshiyuki                         | Matsumura  |                       |                  | Kumamoto Rosai Hospital                          |                                          |                                                         |                                                                                            |
| Toshihiko                         | Kubo       |                       |                  | Japanese Red Cross Matsuyama Hospital            |                                          |                                                         |                                                                                            |
| Masataka                          | Horiuchi   |                       |                  | Medical Association Sugimura Hospital            |                                          |                                                         |                                                                                            |
| Toshihiko                         | Nagano     |                       |                  | Iwasa Hospital Iwasa Maternity                   |                                          |                                                         |                                                                                            |
| Atsushi                           | Takaishi   |                       |                  | Mitoyo General Hospital                          |                                          |                                                         |                                                                                            |
| Masaya                            | Yamamoto   |                       |                  | National Center for Global Health and Medicine   |                                          |                                                         |                                                                                            |



## Supplemental Online Content: Nonauthor Collaborators

\*First name, last name, and suffix (if applicable) are required and will appear in PubMed.

| *First Name and Middle Initial(s) | *Last Name | *Suffix (eg, Jr, III) | Academic Degrees | Institution                                             | Location (city, state/province, country) | Role or Contribution, eg, chair, principal investigator | Group (if more than 1 Group listed in the byline) and/or Subgroup (eg, Steering Committee) |
|-----------------------------------|------------|-----------------------|------------------|---------------------------------------------------------|------------------------------------------|---------------------------------------------------------|--------------------------------------------------------------------------------------------|
| Hitoshi                           | Nakashima  |                       |                  | National Hospital Organization Kagoshima Medical Center |                                          |                                                         |                                                                                            |
| Yukichi                           | Murozono   |                       |                  | Japanese Red Cross Oita Hospital                        |                                          |                                                         |                                                                                            |
| Mitsuru                           | Munemasa   |                       |                  | National Hospital Organization Okayama Medical Center   |                                          |                                                         |                                                                                            |
| Yasushi                           | Sakata     |                       |                  | Osaka University Hospital                               |                                          |                                                         |                                                                                            |
| Naoto                             | Inoue      |                       |                  | Sendai Kousei Hospital                                  |                                          |                                                         |                                                                                            |
| Takehiro                          | Ota        |                       |                  | Takanohara Central Hospital                             |                                          |                                                         |                                                                                            |
| Yutaka                            | Hamano     |                       |                  | Tawaramachi Hamano Hospital                             |                                          |                                                         |                                                                                            |
| Norihiro                          | Abe        |                       |                  | Tokyo Medical University Ibaraki Medical Center         |                                          |                                                         |                                                                                            |
| Toshio                            | Tsubokura  |                       |                  | Tsubokura Cardiovascular Clinic                         |                                          |                                                         |                                                                                            |
| Masami                            | Goto       |                       |                  | Watanabe Hospital                                       |                                          |                                                         |                                                                                            |
| Isao                              | Kubota     |                       |                  | Yamagata University Hospital                            |                                          |                                                         |                                                                                            |
| Masafumi                          | Yano       |                       |                  | Yamaguchi University Hospital                           |                                          |                                                         |                                                                                            |
| Ken                               | Umetani    |                       |                  | Yamanashi Prefectural Central Hospital                  |                                          |                                                         |                                                                                            |
| Taro                              | Date       |                       |                  | Date Naika Clinic                                       |                                          |                                                         |                                                                                            |
| Hideo                             | Morimoto   |                       |                  | Fukagawa Municipal Hospital                             |                                          |                                                         |                                                                                            |
| Toshiyuki                         | Noda       |                       |                  | Gifu Prefectural General Medical Center                 |                                          |                                                         |                                                                                            |
| Seiichi                           | Goto       |                       |                  | Goto Clinic                                             |                                          |                                                         |                                                                                            |
| Kiyoshi                           | Hibi       |                       |                  | Gumyoji eye heart clinic                                |                                          |                                                         |                                                                                            |
| Akira                             | Nakano     |                       |                  | Hikone Municipal Hospital                               |                                          |                                                         |                                                                                            |
| Shinya                            | Hiramitsu  |                       |                  | Hiramitsu Heart Clinic                                  |                                          |                                                         |                                                                                            |
| Yasuki                            | Kihara     |                       |                  | Hiroshima University Hospital                           |                                          |                                                         |                                                                                            |
| Masafumi                          | Sugi       |                       |                  | Imaki City Medical Center                               |                                          |                                                         |                                                                                            |
| Nobuyuki                          | Shiba      |                       |                  | International University of Health and Welfare Hospital |                                          |                                                         |                                                                                            |
| Daisuke                           | Izumi      |                       |                  | Japanese Red Cross Ise Hospital                         |                                          |                                                         |                                                                                            |

## Supplemental Online Content: Nonauthor Collaborators

\*First name, last name, and suffix (if applicable) are required and will appear in PubMed.

| *First Name and Middle Initial(s) | *Last Name | *Suffix (eg, Jr, III) | Academic Degrees | Institution                                  | Location (city, state/province, country) | Role or Contribution, eg, chair, principal investigator | Group (if more than 1 Group listed in the byline) and/or Subgroup (eg, Steering Committee) |
|-----------------------------------|------------|-----------------------|------------------|----------------------------------------------|------------------------------------------|---------------------------------------------------------|--------------------------------------------------------------------------------------------|
| Tetsuya                           | Sato       |                       |                  | Japanese Red Cross Okayama Hospital          |                                          |                                                         |                                                                                            |
| Kosuke                            | Ajiki      |                       |                  | JR Tokyo General Hospital                    |                                          |                                                         |                                                                                            |
| Mitsuru                           | Oishi      |                       |                  | Kagoshima University Hospital                |                                          |                                                         |                                                                                            |
| Michiro                           | Kiryu      |                       |                  | Kanagawa Cardiovascular Medicine             |                                          |                                                         |                                                                                            |
| Tenei                             | Ko         |                       |                  | Kashima Heart Clinic                         |                                          |                                                         |                                                                                            |
| Hideyuki                          | Ando       |                       |                  | Keiai Hospital                               |                                          |                                                         |                                                                                            |
| Syunichi                          | Miyazaki   |                       |                  | Kindai University Hospital                   |                                          |                                                         |                                                                                            |
| Toru                              | Kinugawa   |                       |                  | Kinugawa Cardiology Clinic                   |                                          |                                                         |                                                                                            |
| Hiromasa                          | Otake      |                       |                  | Kobe University Hospital                     |                                          |                                                         |                                                                                            |
| Hiroaki                           | Kitaoka    |                       |                  | Kochi Medical School Hospital                |                                          |                                                         |                                                                                            |
| Shinji                            | Tayama     |                       |                  | JCHO Kumamoto General Hospital               |                                          |                                                         |                                                                                            |
| Yoshihiro                         | Hirata     |                       |                  | Kumamoto Regional Medical Center             |                                          |                                                         |                                                                                            |
| Soichi                            | Honda      |                       |                  | Minami Municipal National Insurance Hospital |                                          |                                                         |                                                                                            |
| Mamoru                            | Manita     |                       |                  | Naha City Hospital                           |                                          |                                                         |                                                                                            |
| Yasuhiro                          | Ishii      |                       |                  | Ogikubo Hospital                             |                                          |                                                         |                                                                                            |
| Hiroyuki                          | Oka        |                       |                  | Oka Clinic                                   |                                          |                                                         |                                                                                            |
| Yasuharu                          | Nanba      |                       |                  | Okayama Rosai Hospital                       |                                          |                                                         |                                                                                            |
| Masami                            | Nishino    |                       |                  | Osaka Rosai Hospital                         |                                          |                                                         |                                                                                            |
| Tomohiro                          | Sakamoto   |                       |                  | Saiseikai Kumamoto Hospital                  |                                          |                                                         |                                                                                            |
| Toshihiko                         | Saito      |                       |                  | Saito Clinic                                 |                                          |                                                         |                                                                                            |
| Hirosumi                          | Sakai      |                       |                  | Sakai Clinic                                 |                                          |                                                         |                                                                                            |
| Makoto                            | Ichikawa   |                       |                  | Sekishindo Hospital                          |                                          |                                                         |                                                                                            |
| Shigeto                           | Namiuchi   |                       |                  | Sendai Open Hospital                         |                                          |                                                         |                                                                                            |
| Toshiki                           | Matsui     |                       |                  | JCHO Shiga Hospital                          |                                          |                                                         |                                                                                            |
| Kanichi                           | Inoue      |                       |                  | South Miyagi Medical Center                  |                                          |                                                         |                                                                                            |
| Nobuyuki                          | Komiyama   |                       |                  | St. Luke's International Hospital            |                                          |                                                         |                                                                                            |

## Supplemental Online Content: Nonauthor Collaborators

\*First name, last name, and suffix (if applicable) are required and will appear in PubMed.

| *First Name and Middle Initial(s) | *Last Name | *Suffix (eg, Jr, III) | Academic Degrees | Institution                                            | Location (city, state/province, country) | Role or Contribution, eg, chair, principal investigator | Group (if more than 1 Group listed in the byline) and/or Subgroup (eg, Steering Committee) |
|-----------------------------------|------------|-----------------------|------------------|--------------------------------------------------------|------------------------------------------|---------------------------------------------------------|--------------------------------------------------------------------------------------------|
| Yoshihiro                         | Akashi     |                       |                  | St. Marianna University School of Medicine Hospital    |                                          |                                                         |                                                                                            |
| Akihiko                           | Matsumura  |                       |                  | Awa Regional Medical Center                            |                                          |                                                         |                                                                                            |
| Yuichi                            | Nakamura   |                       |                  | Takeda General Hospital                                |                                          |                                                         |                                                                                            |
| Tatsuya                           | Komaru     |                       |                  | Tohoku Medical and Pharmaceutical University Hospital  |                                          |                                                         |                                                                                            |
| Takeshi                           | Hosokawa   |                       |                  | Tokyo Haert Center                                     |                                          |                                                         |                                                                                            |
| Taishiro                          | Chikamori  |                       |                  | Tokyo Medical University Hospital                      |                                          |                                                         |                                                                                            |
| Hiroyuki                          | Tanaka     |                       |                  | Tokyo Metropolitan Tama Medical Center                 |                                          |                                                         |                                                                                            |
| Atsushi                           | Suzuki     |                       |                  | JCHO Tokyo Yamate Medical Center                       |                                          |                                                         |                                                                                            |
| Osamu                             | Arasaki    |                       |                  | Tomishiro Central Hospital                             |                                          |                                                         |                                                                                            |
| Kazutaka                          | Aonuma     |                       |                  | University of Tsukuba Hospital                         |                                          |                                                         |                                                                                            |
| Yutaka                            | Wakasa     |                       |                  | Wakasa Medical Clinic                                  |                                          |                                                         |                                                                                            |
| Tomoharu                          | Yoshizawa  |                       |                  | Yamato Municipal Hospital                              |                                          |                                                         |                                                                                            |
| Teruyasu                          | Sugano     |                       |                  | Yokohama City University Hospital                      |                                          |                                                         |                                                                                            |
| Naoto                             | Yokota     |                       |                  | Yokota Naika                                           |                                          |                                                         |                                                                                            |
| Akiyoshi                          | Kakutani   |                       |                  | Yoshinoawa Medical Center                              |                                          |                                                         |                                                                                            |
| Tomohiro                          | Suzuki     |                       |                  | Aizawa Hospital                                        |                                          |                                                         |                                                                                            |
| Yusei                             | Abe        |                       |                  | Akeno Clinic                                           |                                          |                                                         |                                                                                            |
| Toru                              | Kataoka    |                       |                  | Bellland General Hospital                              |                                          |                                                         |                                                                                            |
| Hideki                            | Okayama    |                       |                  | Ehime Prefectural Central Hospital                     |                                          |                                                         |                                                                                            |
| Hiroyoshi                         | Yokoi      |                       |                  | Fukuoka Sanno Hospital                                 |                                          |                                                         |                                                                                            |
| Keiichi                           | Chin       |                       |                  | Hakuai Clinic                                          |                                          |                                                         |                                                                                            |
| Koichi                            | Hasegawa   |                       |                  | Hasegawa Outpatients Clinic for Cardiovascular Disease |                                          |                                                         |                                                                                            |

## Supplemental Online Content: Nonauthor Collaborators

\*First name, last name, and suffix (if applicable) are required and will appear in PubMed.

| *First Name and Middle Initial(s) | *Last Name | *Suffix (eg, Jr, III) | Academic Degrees | Institution                                        | Location (city, state/province, country) | Role or Contribution, eg, chair, principal investigator | Group (if more than 1 Group listed in the byline) and/or Subgroup (eg, Steering Committee) |
|-----------------------------------|------------|-----------------------|------------------|----------------------------------------------------|------------------------------------------|---------------------------------------------------------|--------------------------------------------------------------------------------------------|
| Hirofumi                          | Tomita     |                       |                  | Hirosaki University Hospital                       |                                          |                                                         |                                                                                            |
| Hirotsugu                         | Honzyo     |                       |                  | Honzyo Medical Hospital                            |                                          |                                                         |                                                                                            |
| Hiroya                            | Kawai      |                       |                  | Hyogo Brain And Heart CenterAt Himeji              |                                          |                                                         |                                                                                            |
| Kazuya                            | Yamamoto   |                       |                  | Iida Municipal Hospital                            |                                          |                                                         |                                                                                            |
| Yoshihiro                         | Morino     |                       |                  | Iwate Medical University Hospital                  |                                          |                                                         |                                                                                            |
| Shuji                             | Tsujiyama  |                       |                  | JA Hiroshima General Hospital                      |                                          |                                                         |                                                                                            |
| Michihiro                         | Yoshimura  |                       |                  | The Jikei University Hospital                      |                                          |                                                         |                                                                                            |
| Syuichi                           | Hamasaki   |                       |                  | Kagoshima City Hospital                            |                                          |                                                         |                                                                                            |
| Yawara                            | Nijjima    |                       |                  | Kan-etsu Chu-oh Hospital                           |                                          |                                                         |                                                                                            |
| Takuma                            | Aoyama     |                       |                  | Kizawa Memorial Hospital                           |                                          |                                                         |                                                                                            |
| Yuji                              | Mizuno     |                       |                  | Kumamoto Kinoh Hospital                            |                                          |                                                         |                                                                                            |
| Akira                             | Maki       |                       |                  | Maki Clinic                                        |                                          |                                                         |                                                                                            |
| Kengo                             | Tanabe     |                       |                  | Mitsui Memorial Hospital                           |                                          |                                                         |                                                                                            |
| Toyoaki                           | Murohara   |                       |                  | Nagoya University Hospital                         |                                          |                                                         |                                                                                            |
| Tomoki                            | Nakamura   |                       |                  | Nakamura Clinic                                    |                                          |                                                         |                                                                                            |
| Shojiro                           | Naomi      |                       |                  | Naomi Medicinal Clinic                             |                                          |                                                         |                                                                                            |
| Naoya                             | Matsumoto  |                       |                  | Nihon University Hospital                          |                                          |                                                         |                                                                                            |
| Tohru                             | Minamino   |                       |                  | Niigata University Medical & Dental Hospital       |                                          |                                                         |                                                                                            |
| Hiroshige                         | Sairenji   |                       |                  | Nishiyama Ichou Jyunkanki Geka Clinic              |                                          |                                                         |                                                                                            |
| Noriyuki                          | Miyamoto   |                       |                  | NTT-East Sapporo Hospital                          |                                          |                                                         |                                                                                            |
| Masaya                            | Arikawa    |                       |                  | National Hospital Organization Oita Medical Center |                                          |                                                         |                                                                                            |
| Hiroshi                           | Ito        |                       |                  | Okayama University Hospital                        |                                          |                                                         |                                                                                            |
| Yoshifusa                         | Matsuura   |                       |                  | Sakaemachi Clinic                                  |                                          |                                                         |                                                                                            |
| Shiro                             | Hata       |                       |                  | Sasebo City General Hospital                       |                                          |                                                         |                                                                                            |
| Yusuke                            | Nakatsu    |                       |                  | Shioda Memorial Hospital                           |                                          |                                                         |                                                                                            |
| Tomoya                            | Onodera    |                       |                  | Shizuoka City Shizuoka Hospital                    |                                          |                                                         |                                                                                            |

## Supplemental Online Content: Nonauthor Collaborators

\*First name, last name, and suffix (if applicable) are required and will appear in PubMed.

| *First Name and Middle Initial(s) | *Last Name | *Suffix (eg, Jr, III) | Academic Degrees | Institution                                                 | Location (city, state/province, country) | Role or Contribution, eg, chair, principal investigator | Group (if more than 1 Group listed in the byline) and/or Subgroup (eg, Steering Committee) |
|-----------------------------------|------------|-----------------------|------------------|-------------------------------------------------------------|------------------------------------------|---------------------------------------------------------|--------------------------------------------------------------------------------------------|
| Toru                              | Kato       |                       |                  | National Hospital Organization<br>Tochigi Medical Center    |                                          |                                                         |                                                                                            |
| Hideo                             | Amano      |                       |                  | Toho University Omori Medical<br>Center                     |                                          |                                                         |                                                                                            |
| Eiichi                            | Tokutake   |                       |                  | Tokutake Clinic                                             |                                          |                                                         |                                                                                            |
| Masafumi                          | Kasao      |                       |                  | Tokyo Metropolitan Police Hospital                          |                                          |                                                         |                                                                                            |
| Masahiko                          | Moriguchi  |                       |                  | Toshiba Rinkan Hospital                                     |                                          |                                                         |                                                                                            |
| Kazuhiro                          | Yamamoto   |                       |                  | Tottori University Hospital                                 |                                          |                                                         |                                                                                            |
| Masazumi                          | Tsuji      |                       |                  | Tsuji Internal Medicine and<br>Cardiology and Dental Clinic |                                          |                                                         |                                                                                            |
| Hareaki                           | Yamamoto   |                       |                  | Yamamoto Clinic                                             |                                          |                                                         |                                                                                            |
| Yuzuru                            | Yanbe      |                       |                  | Yokohama General Hospital                                   |                                          |                                                         |                                                                                            |
| Takamasa                          | Iwasawa    |                       |                  | Yokohama General Hospital<br>Uwamachi                       |                                          |                                                         |                                                                                            |
| Makoto                            | Suzuki     |                       |                  | Yokohama Minami Kyousai Hospital                            |                                          |                                                         |                                                                                            |
| Hisao                             | Mori       |                       |                  | Yokohama Sotetsu Building Clinic                            |                                          |                                                         |                                                                                            |
